# Supplementary material for: Derivation of Water Quality Criteria for Carbamazepine and Ecological Risk Assessment in the Nansi Lake Basin
Source: MDPI journal article supplement (doi:10.3390/ijerph191710875), 2022-08-31
Supplement: s1 [file s1]

# **Derivation of water quality criteria for carbamazepine and ecological risk assessment in the Nansi Lake basin**

Jiangyue Wu <sup>a</sup>, Dianlong Shi <sup>b</sup>, Sai Wang <sup>b</sup>, Xi Yang <sup>b</sup>, Hui Zhang <sup>b</sup>, Ting Zhang <sup>b</sup>, Lei Zheng <sup>b\*</sup>,  
Yizhang Zhang <sup>c, d\*</sup>

*<sup>a</sup> National Marine Hazard Mitigation Service, Ministry of Natural Resource of the People's Republic of China, Beijing 100194, China*

*<sup>b</sup> State Environmental Protection Key laboratory of Dioxin Pollution, National Research Center of Environmental Analysis and Measurement, Sino-Japan Friendship Center for Environmental Protection, Beijing 100029, China*

*<sup>c</sup> Chinese Research Academy of Environmental Sciences, Beijing 100012, China*

*<sup>d</sup> Research Institute for Environmental Innovation (Tianjin Binhai), Tianjin 300457, China*

---

\* Corresponding authors. Tel: +86 10 84665751, Fax: +86 10 84634275

E-mail addresses: zhenglei@edcmep.org.cn, zhangyz@craes.org.cn (Y. Zhang)

**Table S1** Instrument parameter for HPLC-MS/MS

| LC parameter       | LC setting                                                                  | MS/MS parameter    | ICP-MS settings         |
|--------------------|-----------------------------------------------------------------------------|--------------------|-------------------------|
| Column             | Waters UPLC BEH C <sub>18</sub> (50 mm × 2.1 mm, 1.7 μm)                    | Mode               | MRM                     |
| Mobile phase A     | ultrapure water with 0.01% formic acid                                      | Ion source         | ESI                     |
| Mobile phase B     | Methanol                                                                    | Capillary voltage  | ESI <sup>+</sup> 3.0 kv |
| Flow rate          | 0.3 mL/min: 0–2 min, 20% B to 60% B; 2–10 min, 60% to 100% B; remain 4 min. | Parent ion (m/z)   | 195.1                   |
| Injected volume    | 10 μL                                                                       | Daughter ion (m/z) | 138.2                   |
| Column temperature | 40°C                                                                        | Cone voltage       | 22 v                    |
|                    |                                                                             | Collision energy   | 17 eV                   |

**Table S2** Carbamazepine occurrence in surface water of China

| Sampling site | Types | Time                         | Concentration<br>(ng/L) | Average<br>(ng/L) | Reference |
|---------------|-------|------------------------------|-------------------------|-------------------|-----------|
| Yangtze River | River | January and March<br>2013    | 1.87                    | 88.16             | [1]       |
|               |       | July 2008                    | 362                     |                   | [2]       |
|               |       | October 2013                 | 2.00                    |                   | [3]       |
|               |       | 2014-2015                    | 13.0                    |                   | [4]       |
|               |       | cold season 2012             | 0.09                    |                   | [5]       |
|               |       | warm season 2013             | 0.16                    |                   | [5]       |
|               |       | November 2009                | 238                     |                   | [6]       |
| Yellow River  | River | cold season 2012             | 0.33                    | 2.97              | [5]       |
|               |       | warm season 2013             | 1.60                    |                   | [5]       |
|               |       | Normal season<br>2014        | 4.82                    |                   | [7]       |
|               |       | Wet season 2014              | 3.57                    |                   | [7]       |
|               |       | Dry season 2014              | 4.53                    |                   | [7]       |
|               |       |                              |                         |                   |           |
| Pearl River   | River | May 2008                     | 15.0                    | 10.48             | [8]       |
|               |       | /                            | 15.6                    |                   | [9]       |
|               |       | /                            | 0.83                    |                   | [10]      |
| Hai River     | River | March 2013                   | 56.4                    | 89.73             | [11]      |
|               |       | cold season 2012             | 0.45                    |                   | [5]       |
|               |       | warm season 2013             | 0.29                    |                   | [5]       |
|               |       | July and November<br>of 2015 | 0.53                    |                   | [12]      |
|               |       | May 2014                     | 24.7                    |                   | [13]      |
|               |       | July 2008                    | 456                     |                   | [14]      |
|               |       |                              |                         |                   |           |
| Huai River    | River | cold season 2012             | 1.73                    | 2.69              | [5]       |
|               |       | warm season 2013             | 1.03                    |                   | [5]       |
|               |       | Normal season                | 3.25                    |                   | [7]       |

| Sampling site  | Types | Time                      | Concentration<br>(ng/L) | Average<br>(ng/L) | Reference |
|----------------|-------|---------------------------|-------------------------|-------------------|-----------|
|                |       | 2014                      |                         |                   |           |
|                |       | Wet season 2014           | 2.92                    |                   | [7]       |
|                |       | Dry season 2013           | 4.53                    |                   | [7]       |
| Songliao River | River | cold season 2012          | 0.07                    | 0.90              | [5]       |
|                |       | warm season 2013          | 0.09                    |                   | [5]       |
|                |       | dry season                | 2.44                    |                   | [15]      |
|                |       | 2018-2019                 | 1.0                     |                   | [16]      |
| Chao lake      | Lake  | January and March<br>2013 | 2.70                    | 2.70              | [1]       |
| Dongting lake  | Lake  | January and March<br>2013 | 2.30                    | 1.18              | [1]       |
|                |       | 2017                      | 0.06                    |                   | [17]      |
| Poyang lake    | Lake  | January and March<br>2013 | 2.60                    | 2.60              | [1]       |
| Tai lake       | Lake  | January and March<br>2013 | 1.30                    | 3.23              | [1]       |
|                |       | 2019                      | 5.16                    |                   | [18]      |
| Qingshan Lake  | Lake  | dry season                | 4.20                    | 1.67              | [15]      |
|                |       | median water<br>season    | 0.22                    |                   | [15]      |
|                |       | wet season                | 0.59                    |                   | [15]      |
| Baiyangdian    | Lake  | May 2019                  | 60.3                    | 36.9              | [19]      |
|                |       | November 2019             | 13.5                    |                   | [19]      |

**Table S3** Chronic toxicity of Carbamazepine to freshwater animals

| Species                                         | Taxonomic Group | Exposure Type | Duration Days (d) | Effect      | Endpoint | Concentrations (ng/L) | Reference |
|-------------------------------------------------|-----------------|---------------|-------------------|-------------|----------|-----------------------|-----------|
| <i>Monera</i>                                   | Algae           | Flow-through  | 56                | Population  | LOEC     | 10000                 | [20]      |
| <i>Chaetophora sp.</i>                          | Algae           | Static        | 9                 | Population  | NOEC     | 2000                  | [21]      |
| <i>Raphidocelis subcapitata</i>                 | Algae           | Not reported  | 4                 | Population  | NOEC     | 100000000             | [22]      |
| <i>Scenedesmus acutus</i><br><i>var. acutus</i> | Algae           | Not reported  | 30                | Population  | NOEC     | 500000                | [23]      |
| <i>Parachlorella kessleri</i>                   | Algae           | Static        | 3                 | Population  | NOEC     | 10000                 | [24]      |
| <i>Chlorella pyrenoidosa</i>                    | Algae           | Not reported  | 30                | Population  | NOEC     | 500000                | [23]      |
| <i>Algae sp.</i>                                | Algae           | Flow-through  | 56                | Population  | NOEC     | 10000                 | [20]      |
| <i>Limnodynastes peronii</i>                    | Amphibians      | Renewal       | 21                | Development | NOEC     | 10000                 | [25]      |
| <i>Ceriodaphnia sp.</i>                         | Crustaceans     | Static        | 31                | Population  | NOEC     | 2000                  | [26]      |
| <i>Calanoida</i>                                | Crustaceans     | Static        | 31                | Population  | NOEC     | 2000                  | [26]      |

| Species                    | Taxonomic Group | Exposure Type | Duration Days (d) | Effect       | Endpoint | Concentrations (ng/L) | Reference |
|----------------------------|-----------------|---------------|-------------------|--------------|----------|-----------------------|-----------|
| <i>Cyclopoida</i>          | Crustaceans     | Static        | 31                | Population   | NOEC     | 2000                  | [26]      |
| <i>Chydorus sp.</i>        | Crustaceans     | Static        | 31                | Population   | NOEC     | 2000                  | [26]      |
| <i>Hyaella azteca</i>      | Crustaceans     | Renewal       | 10                | Growth       | EC10     | 2400000               | [27]      |
| <i>Ceriodaphnia dubia</i>  | Crustaceans     | Renewal       | 7                 | Reproduction | NOEC     | 25000                 | [22]      |
| <i>Daphnia pulex</i>       | Crustaceans     | Renewal       | 14                | Reproduction | NOEC     | 100000                | [28]      |
| <i>Gammarus fossarum</i>   | Crustaceans     | Renewal       | 21                | Biochemistry | NOEL     | 1000000               | [29]      |
| <i>Gobiocypris rarus</i>   | Fish            | Flow-through  | 28                | Enzyme(s)    | NOEC     | 910                   | [30]      |
| <i>Danio rerio</i>         | Fish            | Renewal       | 42                | Reproduction | LOEC     | 11200                 | [31]      |
| <i>Pimephales promelas</i> | Fish            | Renewal       | 28                | Growth       | NOEC     | 862000                | [32]      |
| <i>Cyprinus carpio</i>     | Fish            | Flow-through  | 28                | Histology    | NOEC     | 5000                  | [33]      |
| <i>Oncorhynchus mykiss</i> | Fish            | Renewal       | 42                | Growth       | NOEC     | 200000                | [34]      |
| <i>Plantae</i>             | Plants          | Static        | 31                | Population   | NOEC     | 2000                  | [26]      |
| <i>Typha sp.</i>           | Plants          | Not reported  | 21                | Growth       | NOEC     | 2000000               | [35]      |

| <b>Species</b>                  | <b>Taxonomic Group</b> | <b>Exposure Type</b> | <b>Duration Days (d)</b> | <b>Effect</b> | <b>Endpoint</b> | <b>Concentrations (ng/L)</b> | <b>Reference</b> |
|---------------------------------|------------------------|----------------------|--------------------------|---------------|-----------------|------------------------------|------------------|
| <i>Lemna gibba</i>              | Plants                 | Renewal              | 7                        | Injury        | NOEC            | 1000000                      | [36]             |
| <i>Chironomus tentans</i>       | Insects                | Renewal              | 10                       | Growth        | EC10            | 2600000                      | [27]             |
| <i>Chironomus riparius</i>      | Insects                | Static               | 28                       | Development   | NOEC            | 164000                       | [37]             |
| <i>Invertebrates</i>            | Invertebrates          | Static               | 31                       | Population    | NOEC            | 2000                         | [26]             |
| <i>Brachionus calyciflorus</i>  | Invertebrates          | Not reported         | 2                        | Mortality     | NOEC            | 377000                       | [22]             |
| <i>Gastropoda</i>               | Molluscs               | Static               | 31                       | Population    | NOEC            | 2000                         | [26]             |
| <i>Planorbella trivolvis</i>    | Molluscs               | Static               | 31                       | Population    | NOEC            | 2000                         | [26]             |
| <i>Physella acuta</i>           | Molluscs               | Static               | 31                       | Population    | NOEC            | 2000                         | [26]             |
| <i>Elimia livescens</i>         | Molluscs               | Static               | 31                       | Population    | NOEC            | 2000                         | [26]             |
| <i>Lymnaea stagnalis</i>        | Molluscs               | Static               | 31                       | Population    | NOEC            | 2000                         | [26]             |
| <i>Potamopyrgus antipodarum</i> | Molluscs               | Renewal              | 28                       | Reproduction  | NOEC            | 250000                       | [38]             |
| <i>Corbicula manilensis</i>     | Molluscs               | Renewal              | 30                       | Behavior      | NOEC            | 4620                         | [39]             |

## Reference

1. Wu, C., Huang, X., Witter, J.D., Spongberg, A.L., Wang, K., Wang, D., Liu, J. Occurrence of pharmaceuticals and personal care products and associated environmental risks in the central and lower Yangtze river, China. *Ecotox. Environ. Safe.* **2014**, 106, 19-26. <https://doi.org/10.1016/j.ecoenv.2014.04.029>.
2. Zhou, X., Dai, C., Zhang, Y., Surampalli, R., Zhang, T. A preliminary study on the occurrence and behavior of carbamazepine (CBZ) in aquatic environment of Yangtze River Delta, China. *Environ. Monit. Assess.* **2011**, 173, 45-53. <https://doi.org/10.1007/s10661-010-1369-8>.
3. Liu, J., Lu, G., Xie, Z., Zhang, Z., Li, S., Yan, Z. Occurrence, bioaccumulation and risk assessment of lipophilic pharmaceutically active compounds in the downstream rivers of sewage treatment plants. *Sci. Total. Environ.* **2015**, 511, 54-62. <https://doi.org/10.1016/j.scitotenv.2014.12.033>.
4. Zhou, H., Ying, T., Wang, X., Liu, J. Occurrence and preliminarily environmental risk assessment of selected pharmaceuticals in the urban rivers, China. *Sci. Rep-UK.* **2016**, 6, 1-10. <https://doi.org/10.1038/srep34928>.
5. Sun, J., Luo, Q., Wang, D., Wang, Z. Occurrences of pharmaceuticals in drinking water sources of major river watersheds, China. *Ecotox. Environ. Safe.* **2015**, 117, 132-140. <https://doi.org/10.1016/j.ecoenv.2015.03.032>.
6. Yang, J.-F., Ying, G.-G., Zhao, J.-L., Tao, R., Su, H.-C., Liu, Y.-S. Spatial and seasonal distribution of selected antibiotics in surface waters of the Pearl Rivers, China. *J. Environ. Sci. Heal. B* **2011**, 46, 272-280. <https://doi.org/10.1080/03601234.2011.540540>.
7. Feng, J., Liu, Q., Ru, X., Xi, N., Sun, J. Occurrence and distribution of priority pharmaceuticals in the Yellow River and the Huai River in Henan, China. *Environ. Sci. Pollut. Res.* **2020**, 27, 16816-16826. <https://doi.org/10.1007/s11356-020-08131-6>.
8. Yu, Y., Huang, Q., Wang, Z., Zhang, K., Tang, C., Cui, J., Feng, J., Peng, X. Occurrence and behavior of pharmaceuticals, steroid hormones, and endocrine-disrupting personal care products in wastewater and the recipient river water of the Pearl River Delta, South China. *J. Environ. Monitor.* **2011**, 13, 871-878. <https://doi.org/10.1039/C0EM00602E>.
9. Zhao, J.L., Ying, G.G., Liu, Y.S., Chen, F., Yang, J.F., Wang, L., Yang, X.B., Stauber, J.L., Warne, M.S.J. Occurrence and a screening - level risk assessment of human pharmaceuticals in the Pearl River system, South China. *Environ. Toxicol. Chem.* **2010**, 29, 1377-1384. <https://doi.org/10.1002/etc.161>.
10. Ding, Z., He, D., Wan, D., Wu, G., Zhang, S. Determination of thirteen pharmaceutical and personal care products in surface water by liquid chromatography-tandem mass spectrometry. *Chin. J. Environ. Eng.* **2015**, 9, 2291-2296. (in Chinese).
11. Dai, G., Wang, B., Huang, J., Dong, R., Deng, S., Yu, G. Occurrence and source apportionment of pharmaceuticals and personal care products in the Beiyun River of Beijing, China. *Chemosphere* **2015**, 119, 1033-1039. <https://doi.org/10.1016/j.chemosphere.2014.08.056>.
12. Ma, R., Wang, B., Yin, L., Zhang, Y., Deng, S., Huang, J., Wang, Y., Yu, G. Characterization of pharmaceutically active compounds in Beijing, China: occurrence pattern, spatiotemporal distribution and its environmental implication. *J. Hazard. Mater.* **2017**, 323, 147-155.



<https://doi.org/10.1016/j.jhazmat.2016.05.030>.

13. Dai, G., Wang, B., Fu, C., Dong, R., Huang, J., Deng, S., Wang, Y., Yu, G. Pharmaceuticals and personal care products (PPCPs) in urban and suburban rivers of Beijing, China: occurrence, source apportionment and potential ecological risk. *Environ. Sci-Proc. Imp.* **2016**, 18, 445-455. <https://doi.org/10.1039/C6EM00018E>.
14. Zhou, H., Wu, C., Huang, X., Gao, M., Wen, X., Tsuno, H., Tanaka, H. Occurrence of selected pharmaceuticals and caffeine in sewage treatment plants and receiving rivers in Beijing, China. *Water Environ. Res.* **2010**, 82, 2239-2248. <https://doi.org/10.2175/106143010X12681059116653>.
15. Zhu, S., Chen, H., Li, J. Sources, distribution and potential risks of pharmaceuticals and personal care products in Qingshan Lake basin, Eastern China. *Ecotox. Environ. Safe.* **2013**, 96, 154-159. <https://doi.org/10.1016/j.ecoenv.2013.06.033>.
16. Zhang, L., Du, S., Zhang, X., Lyu, G., Dong, D., Hua, X., Zhang, W., Guo, Z. Occurrence, distribution, and ecological risk of pharmaceuticals in a seasonally ice-sealed river: From ice formation to melting. *J. Hazard. Mater.* **2020**, 389, 122083. <https://doi.org/10.1016/j.jhazmat.2020.122083>.
17. Wang, Y., Liu, Y., Lu, S., Liu, X., Meng, Y., Zhang, G., Zhang, Y., Wang, W., Guo, X. Occurrence and ecological risk of pharmaceutical and personal care products in surface water of the Dongting Lake, China-during rainstorm period. *Environ. Sci. Pollut. Res.* **2019**, 26, 28796-28807. <https://doi.org/10.1007/s11356-019-06047-4>.
18. An, W., Duan, L., Zhang, Y., Zhou, Y., Wang, B., Yu, G. Pollution characterization of pharmaceutically active compounds (PhACs) in the northwest of Tai Lake Basin, China: Occurrence, temporal changes, riverine flux and risk assessment. *J. Hazard. Mater.* **2022**, 422, 126889. <https://doi.org/10.1016/j.jhazmat.2021.126889>.
19. Yang, L., Wang, T., Zhou, Y., Shi, B., Bi, R., Meng, J. Contamination, source and potential risks of pharmaceuticals and personal products (PPCPs) in Baiyangdian Basin, an intensive human intervention area, China. *Sci. Total. Environ.* **2021**, 760, 144080. <https://doi.org/10.1016/j.scitotenv.2020.144080>.
20. Lawrence, J.R., Swerhone, G.D., Wassenaar, L.I., Neu, T.R. Effects of selected pharmaceuticals on riverine biofilm communities. *Can. J. Microbiol.* **2005**, 51, 655-669. <https://doi.org/10.1139/w05-047>.
21. Jarvis, A.L., Bernot, M.J., Bernot, R.J. The effects of the pharmaceutical carbamazepine on life history characteristics of flat-headed mayflies (Heptageniidae) and aquatic resource interactions. *Ecotoxicology* **2014**, 23, 1701-1712. <https://doi.org/10.1007/s10646-014-1309-4>.
22. Ferrari, B.t., Paxéus, N., Giudice, R.L., Pollio, A., Garric, J. Ecotoxicological impact of pharmaceuticals found in treated wastewaters: study of carbamazepine, clofibric acid, and diclofenac. *Ecotox. Environ. Safe.* **2003**, 55, 359-370. [https://doi.org/10.1016/S0147-6513\(02\)00082-9](https://doi.org/10.1016/S0147-6513(02)00082-9).
23. Zhang, W., Zhang, M., Lin, K., Sun, W., Xiong, B., Guo, M., Cui, X., Fu, R. Eco-toxicological effect of Carbamazepine on *Scenedesmus obliquus* and *Chlorella pyrenoidosa*. *Environ. Toxicol. Pharm.* **2012**, 33, 344-352. <https://doi.org/10.1016/j.etap.2011.12.024>.
24. Haase, S.M., Panas, P., Rath, T., Huchzermeyer, B. Effects of carbamazepine on two

- microalgae species differing in stress resistance. *Water Air Soil Poll.* **2015**, 226, 1-12. <https://doi.org/10.1007/s11270-015-2562-8>.
25. Melvin, S.D., Cameron, M.C., Lanctôt, C.M. Individual and mixture toxicity of pharmaceuticals naproxen, carbamazepine, and sulfamethoxazole to Australian striped marsh frog tadpoles (*Limnodynastes peronii*). *J. Toxicol. Env. Heal. A* **2014**, 77, 337-345. <https://doi.org/10.1080/15287394.2013.865107>.
26. Jarvis, A.L., Bernot, M.J., Bernot, R.J. The effects of the psychiatric drug carbamazepine on freshwater invertebrate communities and ecosystem dynamics. *Sci. Total. Environ.* **2014**, 496, 461-470. <https://doi.org/10.1016/j.scitotenv.2014.07.084>.
27. Dussault, È.B., Balakrishnan, V.K., Sverko, E., Solomon, K.R., Sibley, P.K. Toxicity of human pharmaceuticals and personal care products to benthic invertebrates. *Environ. Toxicol. Chem.* **2008**, 27, 425-432. <https://doi.org/10.1897/07-354R.1>.
28. Lürling, M., Sargent, E., Roessink, I. Life - history consequences for *Daphnia pulex* exposed to pharmaceutical carbamazepine. *Environ. Toxicol.* **2006**, 21, 172-180. <https://doi.org/10.1002/tox.20171>.
29. Jubeaux, G., Simon, R., Salvador, A., Quéau, H., Chaumot, A., Geffard, O. Vitellogenin-like proteins in the freshwater amphipod *Gammarus fossarum* (Koch, 1835): functional characterization throughout reproductive process, potential for use as an indicator of oocyte quality and endocrine disruption biomarker in males. *Aquat. Toxicol.* **2012**, 112, 72-82. <https://doi.org/10.1016/j.aquatox.2012.01.011>.
30. Yan, S., Chen, R., Wang, M., Zha, J. Carbamazepine at environmentally relevant concentrations caused DNA damage and apoptosis in the liver of Chinese rare minnows (*Gobiocypris rarus*) by the Ras/Raf/ERK/p53 signaling pathway. *Environ. Pollut.* **2021**, 270, 116245. <https://doi.org/10.1016/j.envpol.2020.116245>.
31. Fraz, S., Lee, A.H., Wilson, J.Y. Gemfibrozil and carbamazepine decrease steroid production in zebrafish testes (*Danio rerio*). *Aquat. Toxicol.* **2018**, 198, 1-9. <https://doi.org/10.1016/j.aquatox.2018.02.006>.
32. Overturf, M., Overturf, C., Baxter, D., Hala, D., Constantine, L., Venables, B., Huggett, D. Early life-stage toxicity of eight pharmaceuticals to the fathead minnow, *Pimephales promelas*. *Arch. Environ. Con. Tox.* **2012**, 62, 455-464. <https://doi.org/10.1007/s00244-011-9723-6>.
33. Tribskorn, R., Casper, H., Scheil, V., Schwaiger, J. Ultrastructural effects of pharmaceuticals (carbamazepine, clofibrilic acid, metoprolol, diclofenac) in rainbow trout (*Oncorhynchus mykiss*) and common carp (*Cyprinus carpio*). *Anal. Bioanal. Chem.* **2007**, 387, 1405-1416. <https://doi.org/10.1007/s00216-006-1033-x>.
34. Li, Z.H., Zlabek, V., Velisek, J., Grabic, R., Machova, J., Randak, T. Physiological condition status and muscle - based biomarkers in rainbow trout (*Oncorhynchus mykiss*), after long - term exposure to carbamazepine. *J. Appl. Toxicol.* **2010**, 30, 197-203. <https://doi.org/10.1002/jat.1482>.
35. Dordio, A., Belo, M., Teixeira, D.M., Carvalho, A.P., Dias, C., Picó, Y., Pinto, A.P. Evaluation of carbamazepine uptake and metabolism by *Typha* spp., a plant with potential use in phytotreatment. *Bioresource Technol.* **2011**, 102, 7827-7834. <https://doi.org/10.1016/j.biortech.2011.06.050>.
36. Brain, R.A., Johnson, D.J., Richards, S.M., Hanson, M.L., Sanderson, H., Lam, M.W., Young,

- C., Mabury, S.A., Sibley, P.K., Solomon, K.R. Microcosm evaluation of the effects of an eight pharmaceutical mixture to the aquatic macrophytes *Lemna gibba* and *Myriophyllum sibiricum*. *Aquat. Toxicol.* **2004**, 70, 23-40. <https://doi.org/10.1016/j.aquatox.2004.06.011>.
37. Oetken, M., Nentwig, G., Löffler, D., Ternes, T., Oehlmann, J. Effects of pharmaceuticals on aquatic invertebrates. Part I. The antiepileptic drug carbamazepine. *Arch. Environ. Con. Tox.* **2005**, 49, 353-361. <https://doi.org/10.1007/s00244-004-0211-0>.
38. Nentwig, G., Oetken, M., Oehlmann, J., 2004. Effects of pharmaceuticals on aquatic invertebrates - the example of carbamazepine and clofibric acid, *Pharmaceuticals in the Environment*. Springer,, pp. 195-208. [https://doi.org/10.1007/978-3-662-09259-0\\_16](https://doi.org/10.1007/978-3-662-09259-0_16).
39. Chen, H., Zha, J., Liang, X., Li, J., Wang, Z. Effects of the human antiepileptic drug carbamazepine on the behavior, biomarkers, and heat shock proteins in the Asian clam *Corbicula fluminea*. *Aquat. Toxicol.* **2014**, 155, 1-8. <https://doi.org/10.1016/j.aquatox.2014.06.001>.
